# Supplementary material for: Single-step synthesis of ternary metal chalcogenides (sf-CuInS2 and sf-CuInSe2) stripped off the organic cover and their use as a catalyst for symmetric Glaser–Hay coupling reactions
Source: Royal Society of Chemistry journal article supplement (doi:10.1039/d4dt00442f), 2024-01-01
Supplement: d4dt00442f1.pdf [file d4dt00442f1.pdf]

## Supporting Information

### **Single-step synthesis of ternary metal chalcogenides (sf-CuInS<sub>2</sub> and sf-CuInSe<sub>2</sub>) stripped off the organic cover and their use as a catalyst for symmetric Glaser–Hay coupling reactions.**

Venkateswara Rao Velpuri (Ph.D), Sanyasinaidu Gottapu (Ph.D), and Krishnamurthi Muralidharan (Ph.D.)\*

<sup>a</sup>School of Chemistry, University of Hyderabad, Gachibowli, Hyderabad 500046. India

\* Corresponding author's complete contact details:

Email: murali@uohyd.ac.in

Phone: +91 40 2313 4819

#### Contents

|                                                                                                                               |      |
|-------------------------------------------------------------------------------------------------------------------------------|------|
| 1. Copy of <sup>1</sup> H NMR & <sup>13</sup> C NMR of the synthesized compounds                                              | 2-11 |
| 2. Figure S11. FT-IR spectrum of sf-CuInS <sub>2</sub>                                                                        | 12   |
| 3. Figure S12. FT-IR spectrum of sf-CuInSe <sub>2</sub>                                                                       | 12   |
| 4. Figure S13. Powder X-ray diffraction pattern of sf-CuInS <sub>2</sub> nanoparticles after 6 <sup>th</sup> cycle catalysis. | 13   |

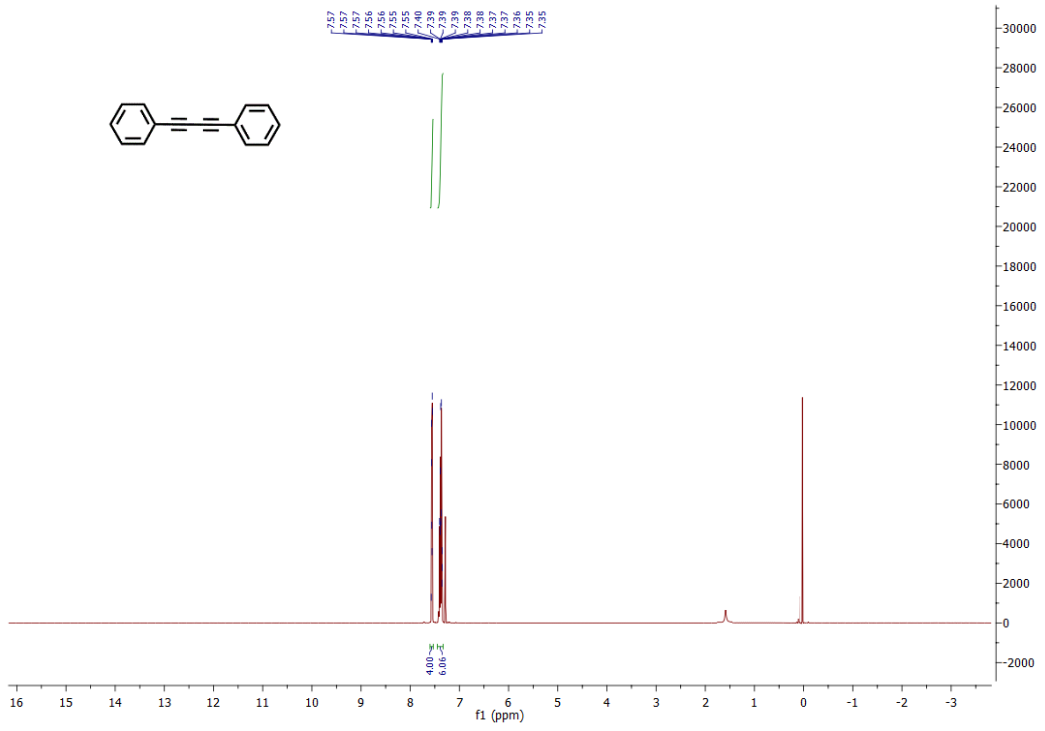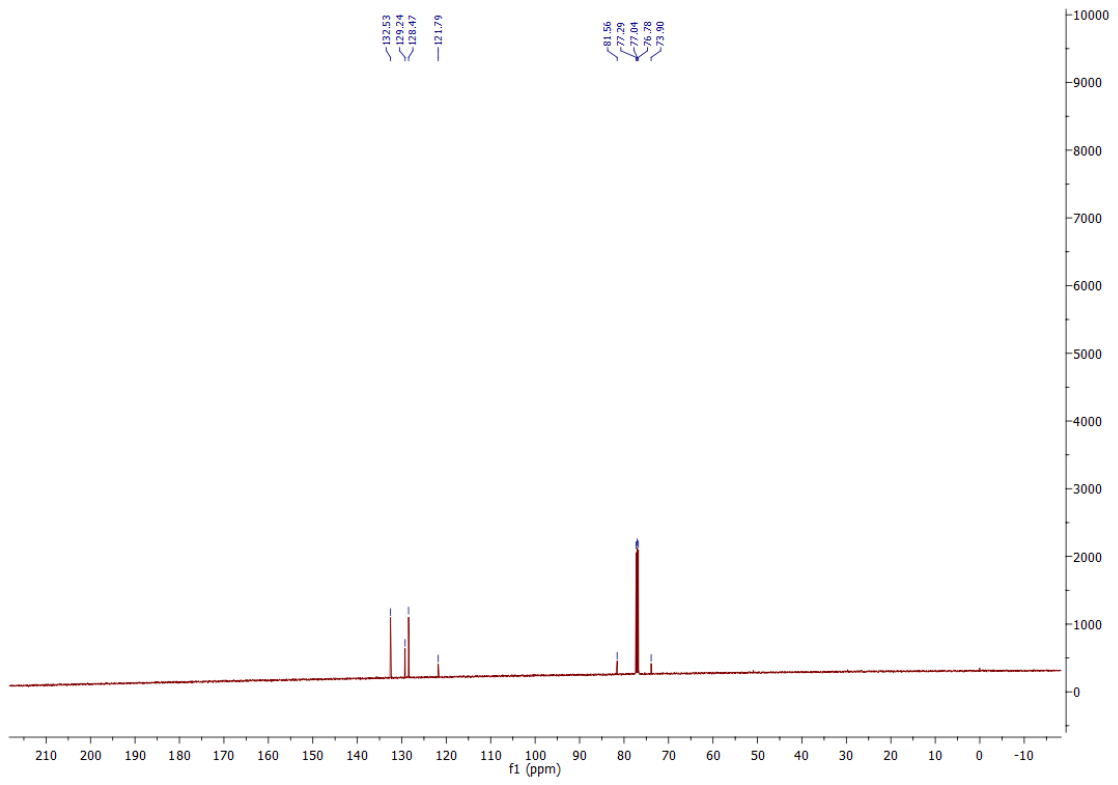

Figure S1: <sup>1</sup>H NMR and <sup>13</sup>C NMR data of the compound 1

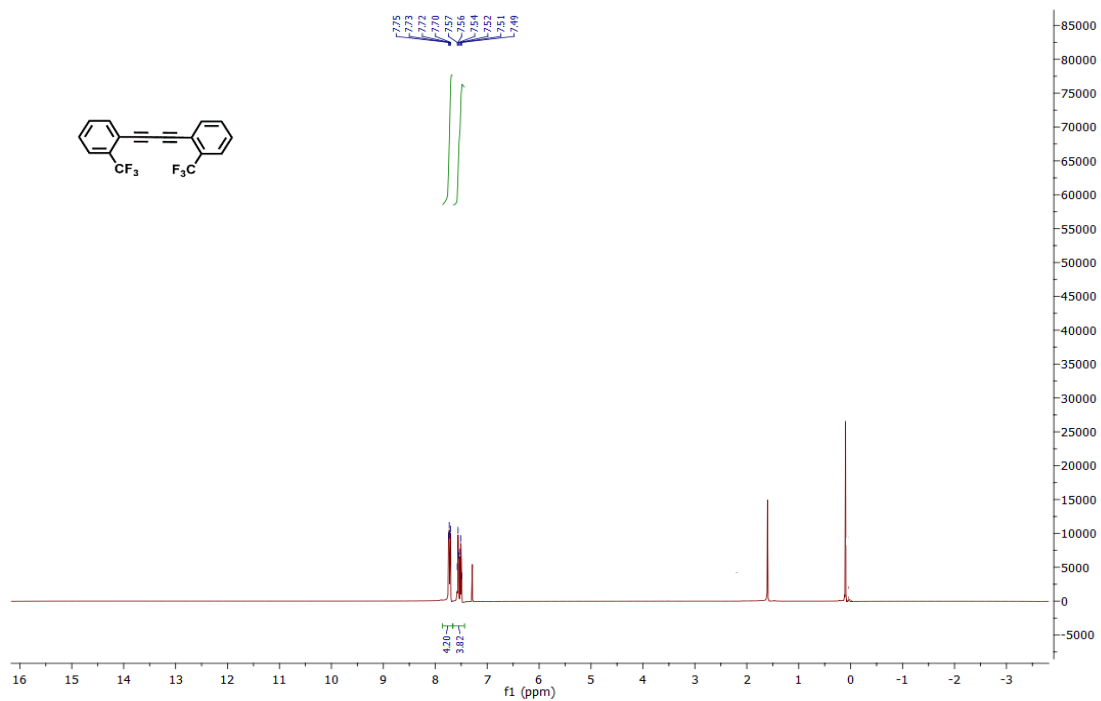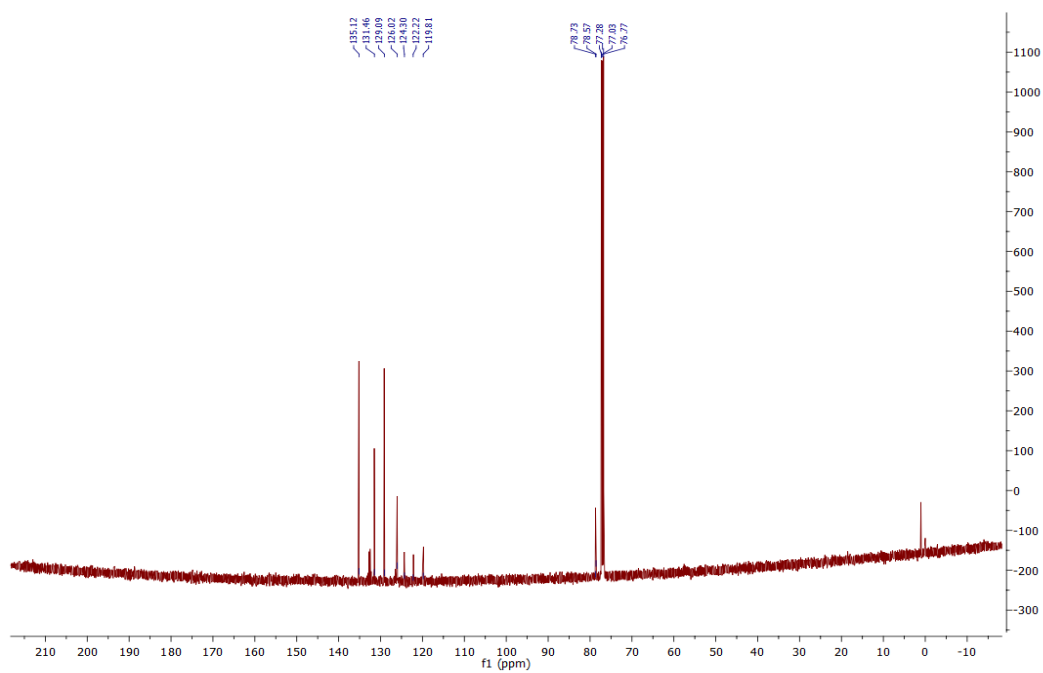

Figure S2:  $^1\text{H}$  NMR and  $^{13}\text{C}$  NMR data of the compound 2

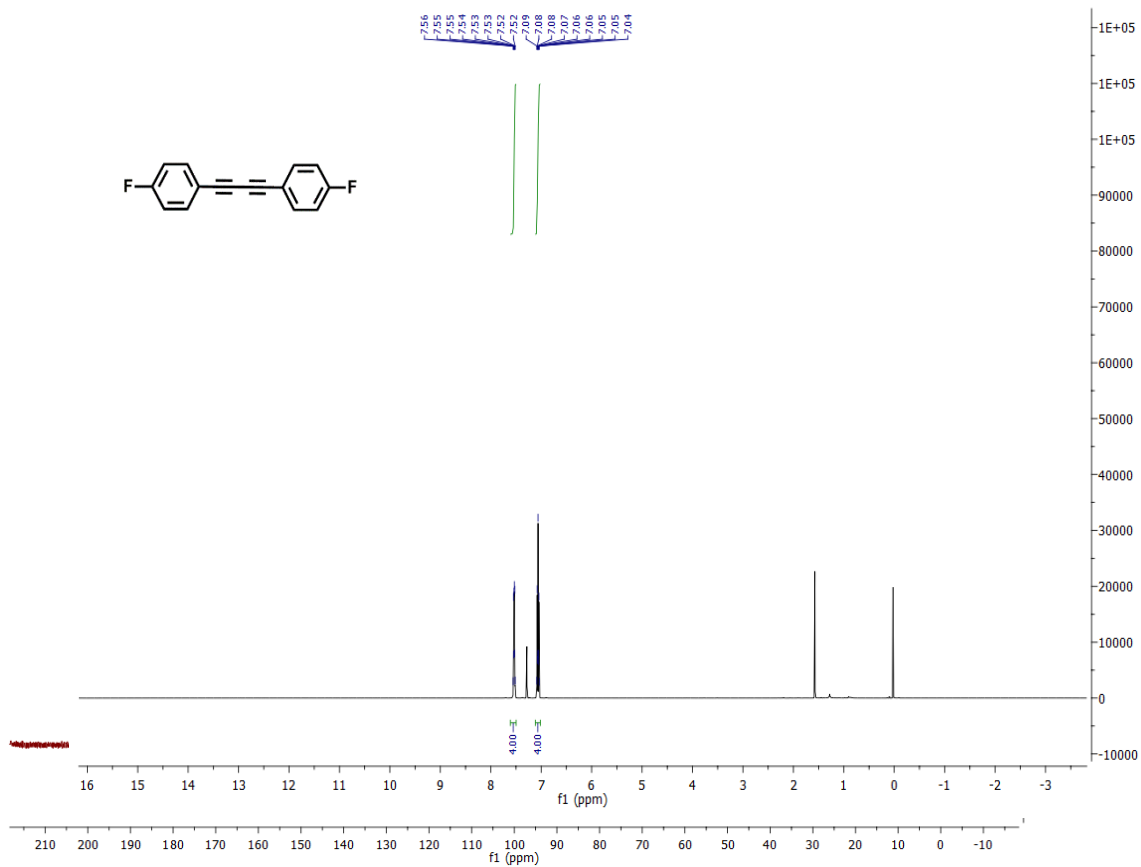

Figure S3: <sup>1</sup>H NMR and <sup>13</sup>C NMR data of the compound 3

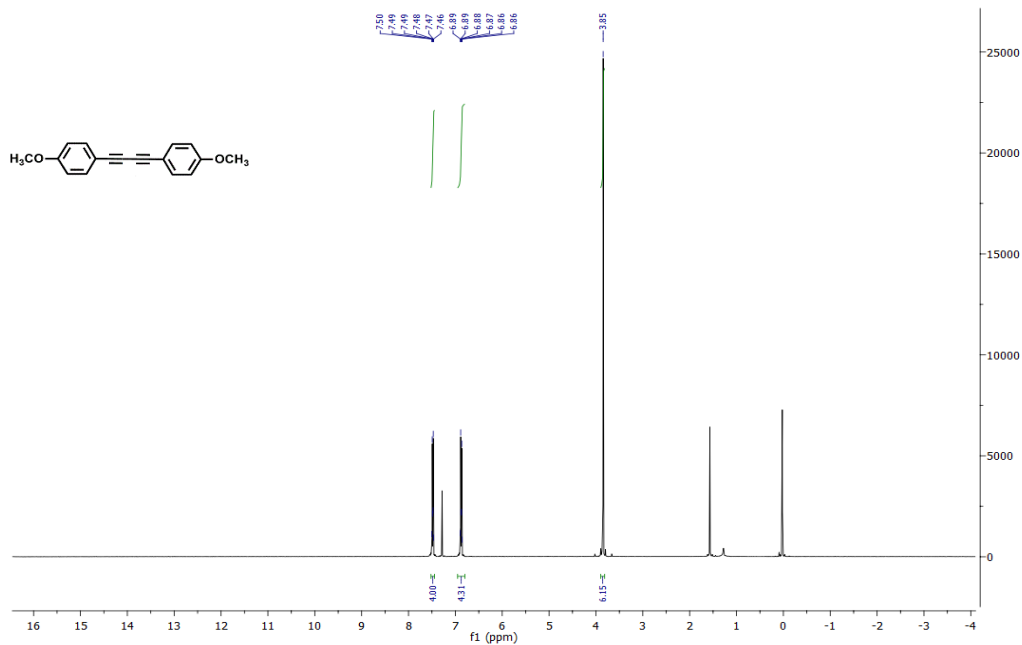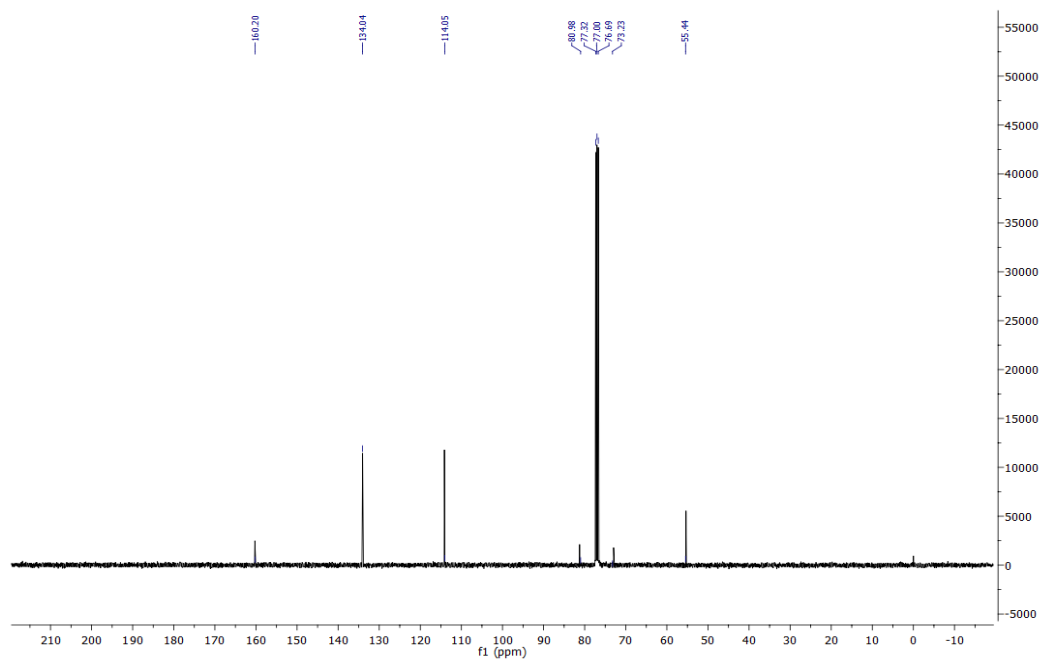

**Figure S4:  $^1\text{H}$  NMR and  $^{13}\text{C}$  NMR data of the compound 4**

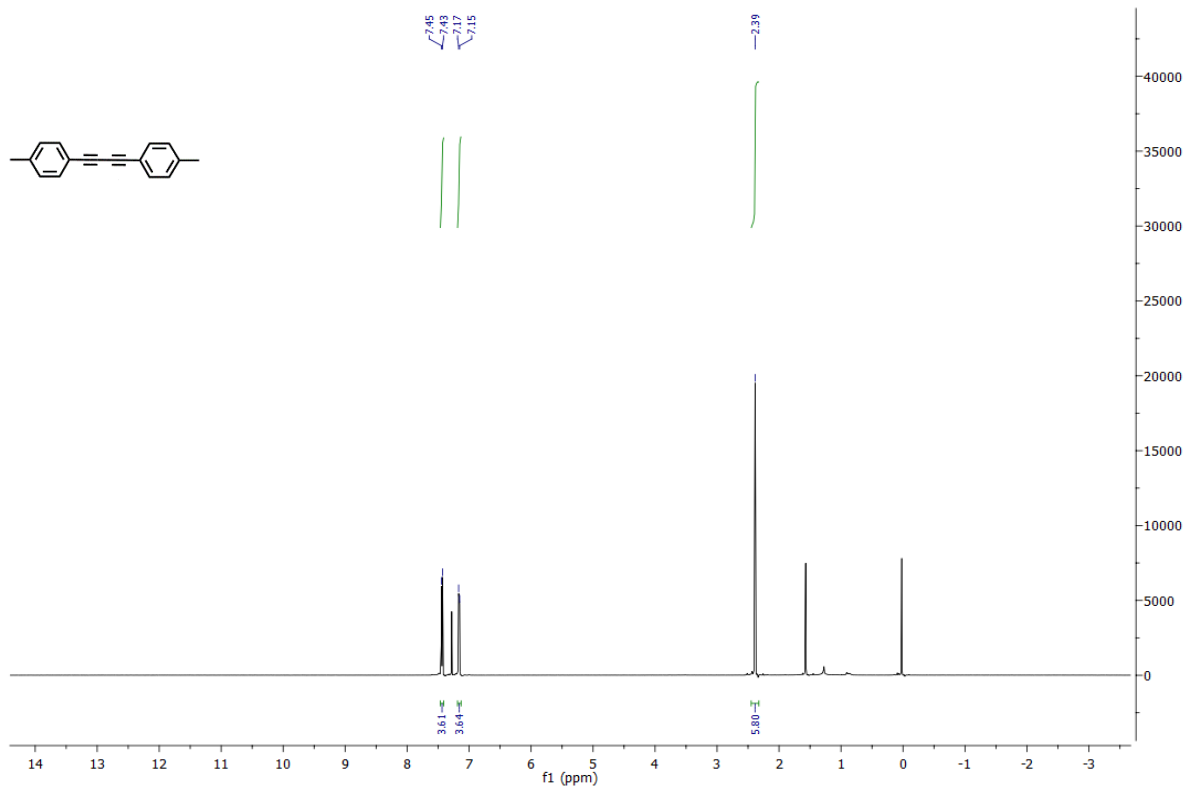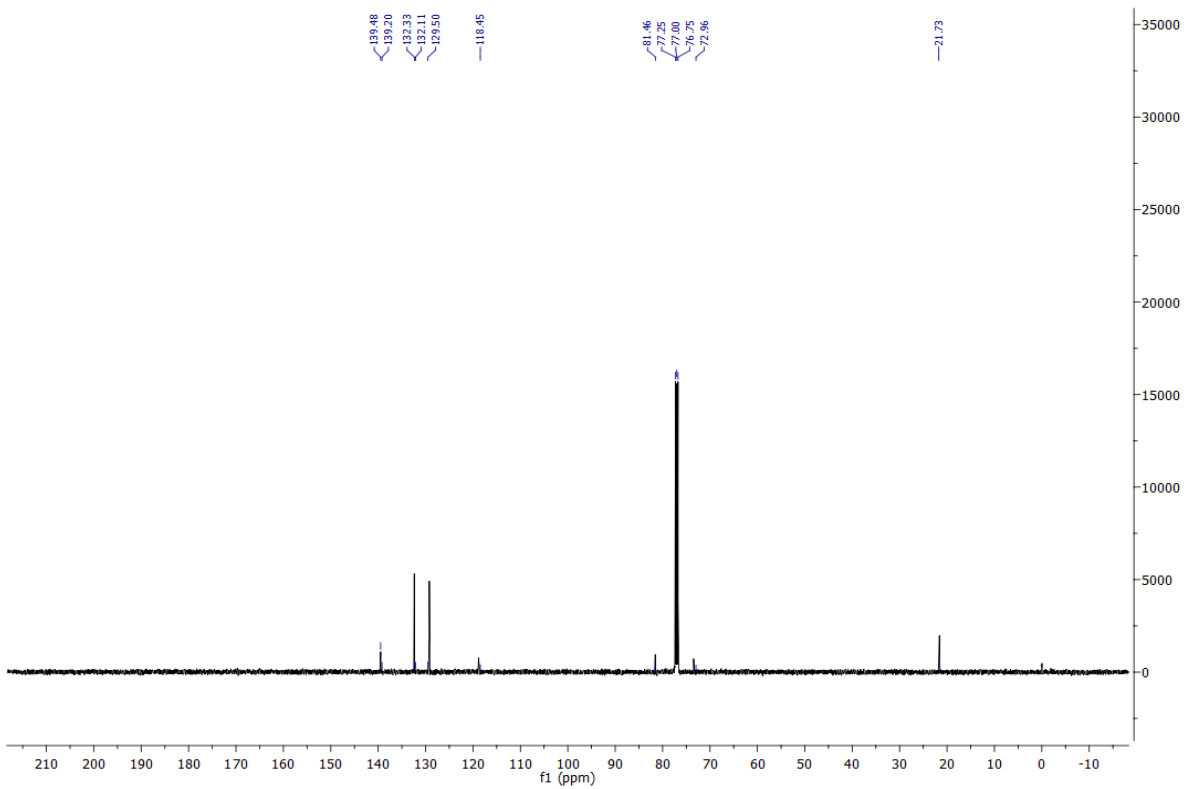





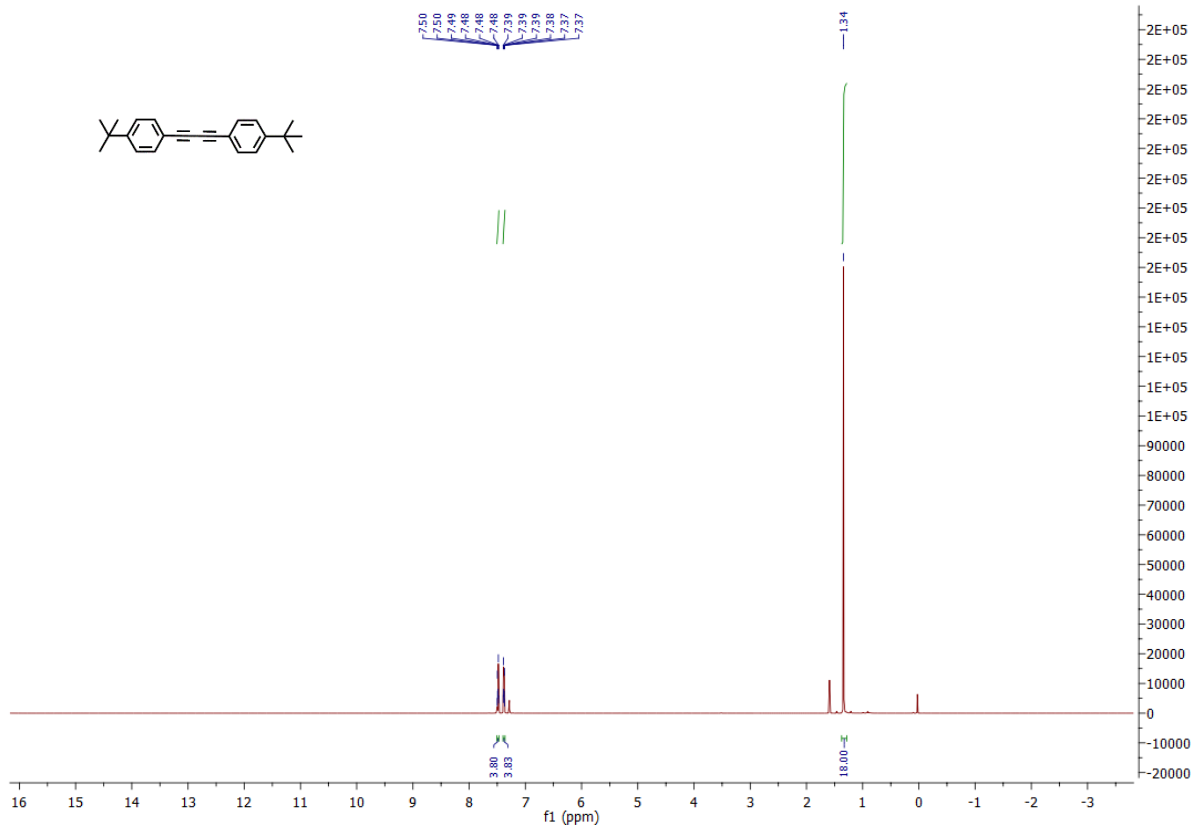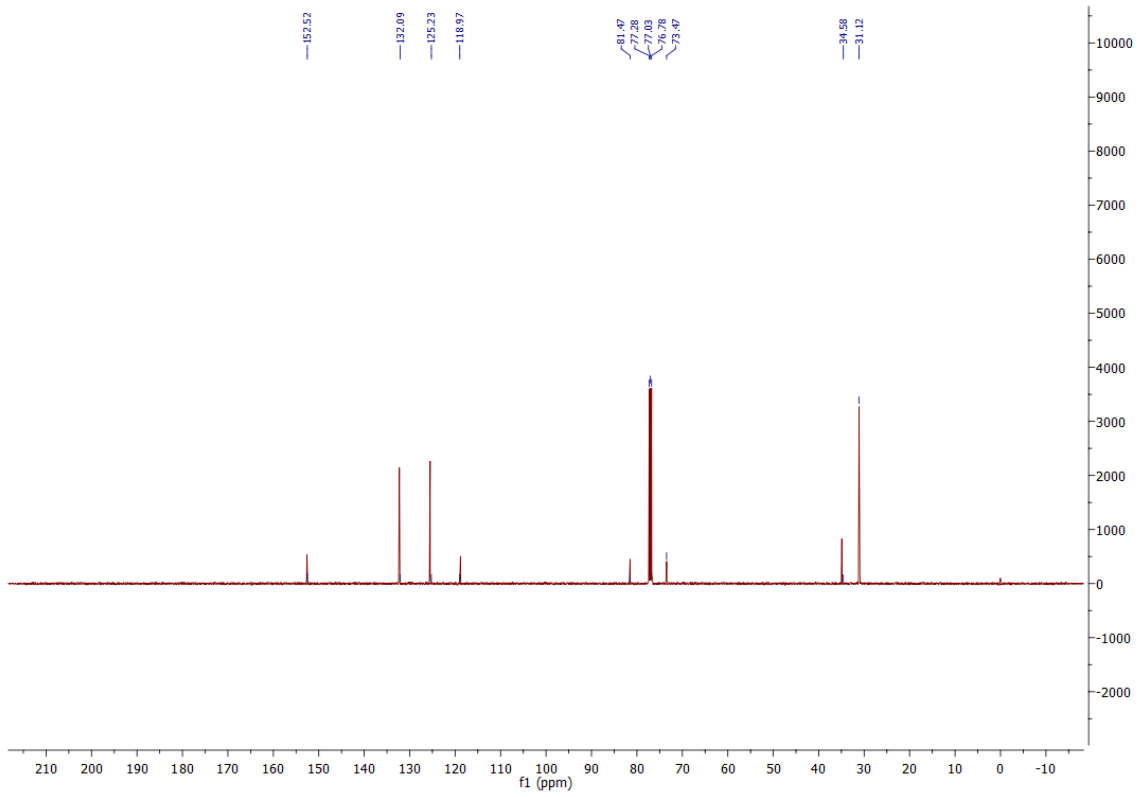

**Figure S6:  $^1\text{H}$  NMR and  $^{13}\text{C}$  NMR data of the compound 6**

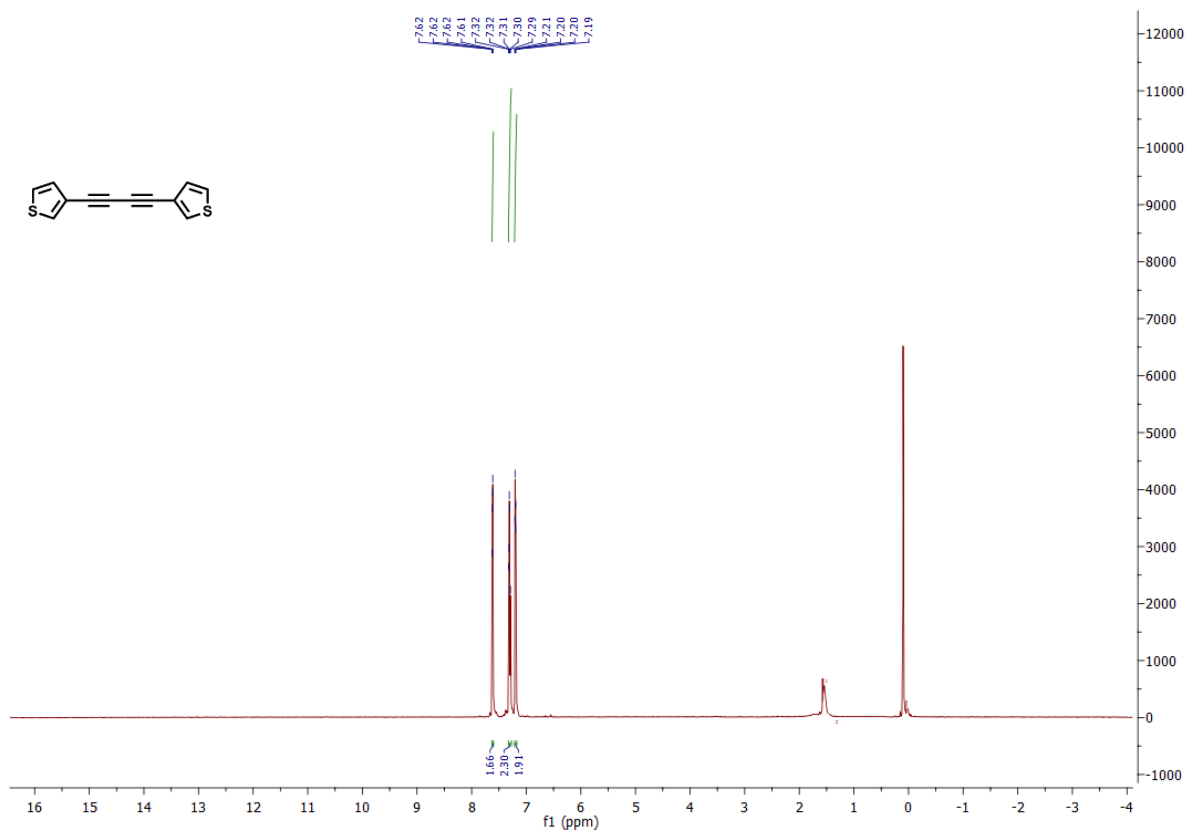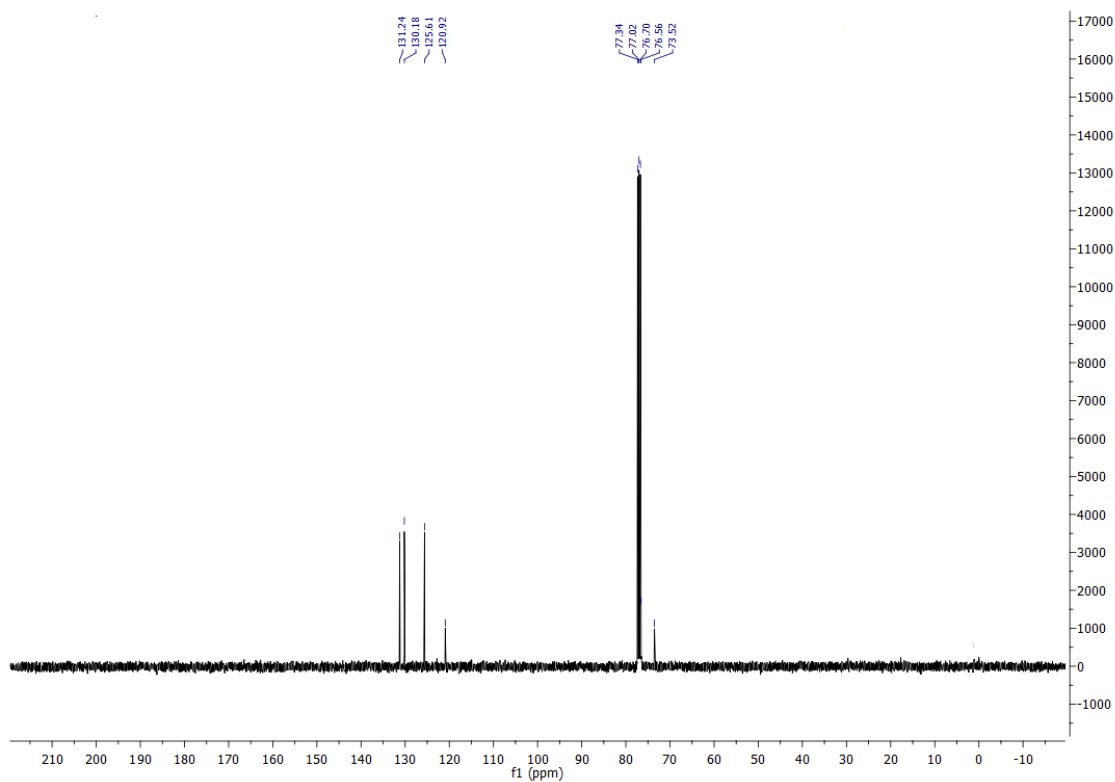

**Figure S7:  $^1\text{H}$  NMR and  $^{13}\text{C}$  NMR data of the compound 7**

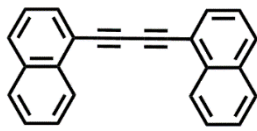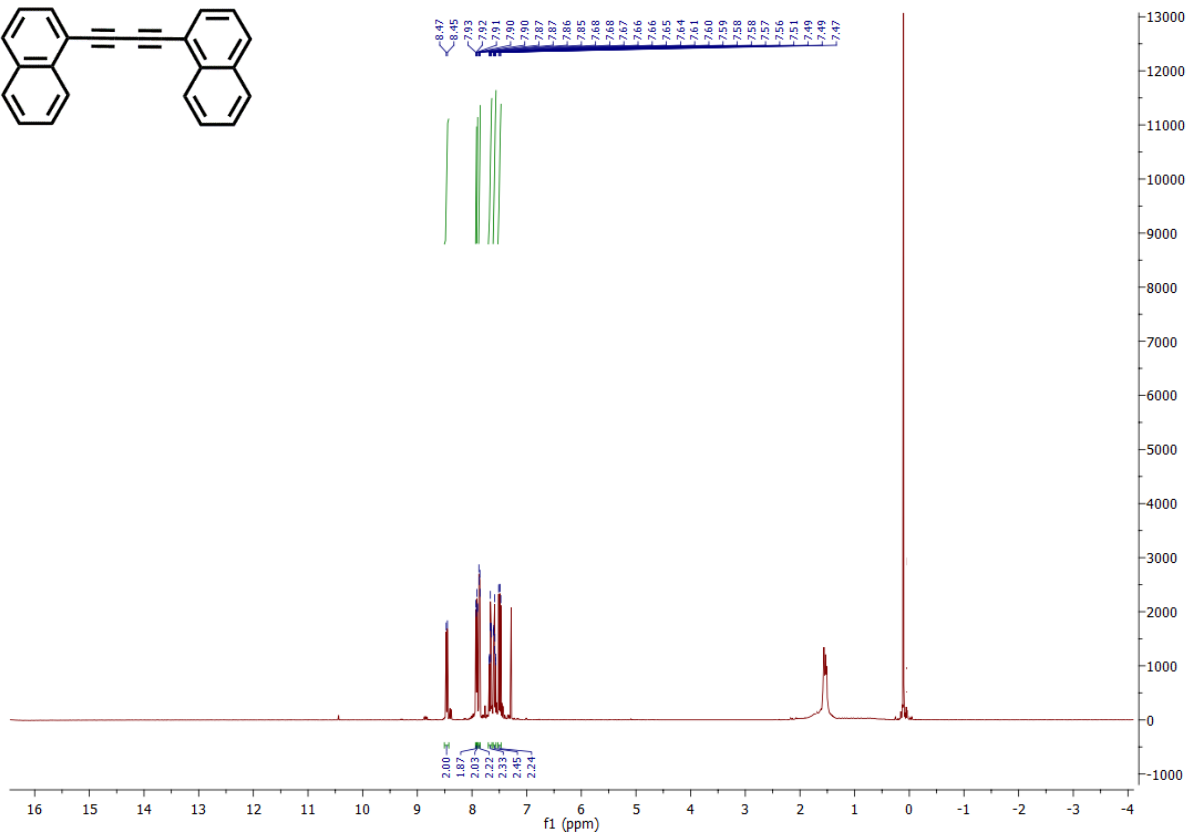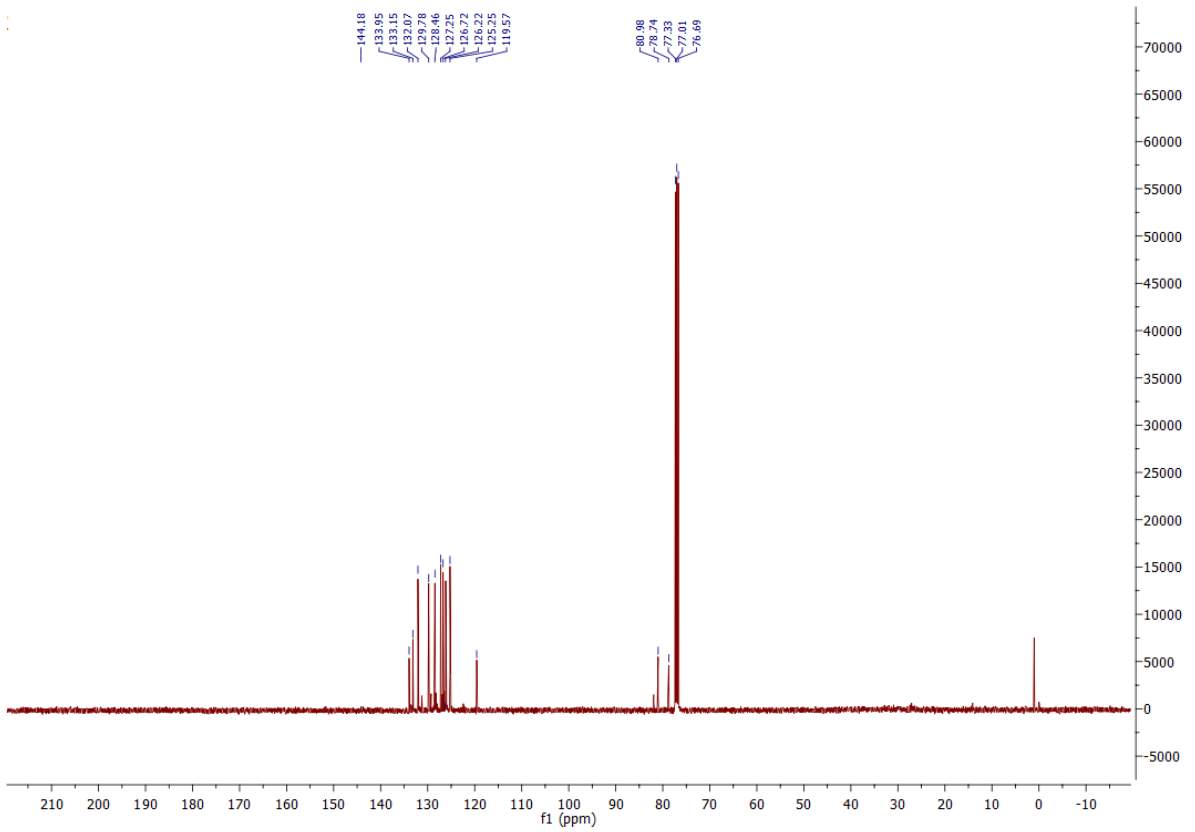

**Figure S8:  $^1\text{H}$  NMR and  $^{13}\text{C}$  NMR data of the compound 8**

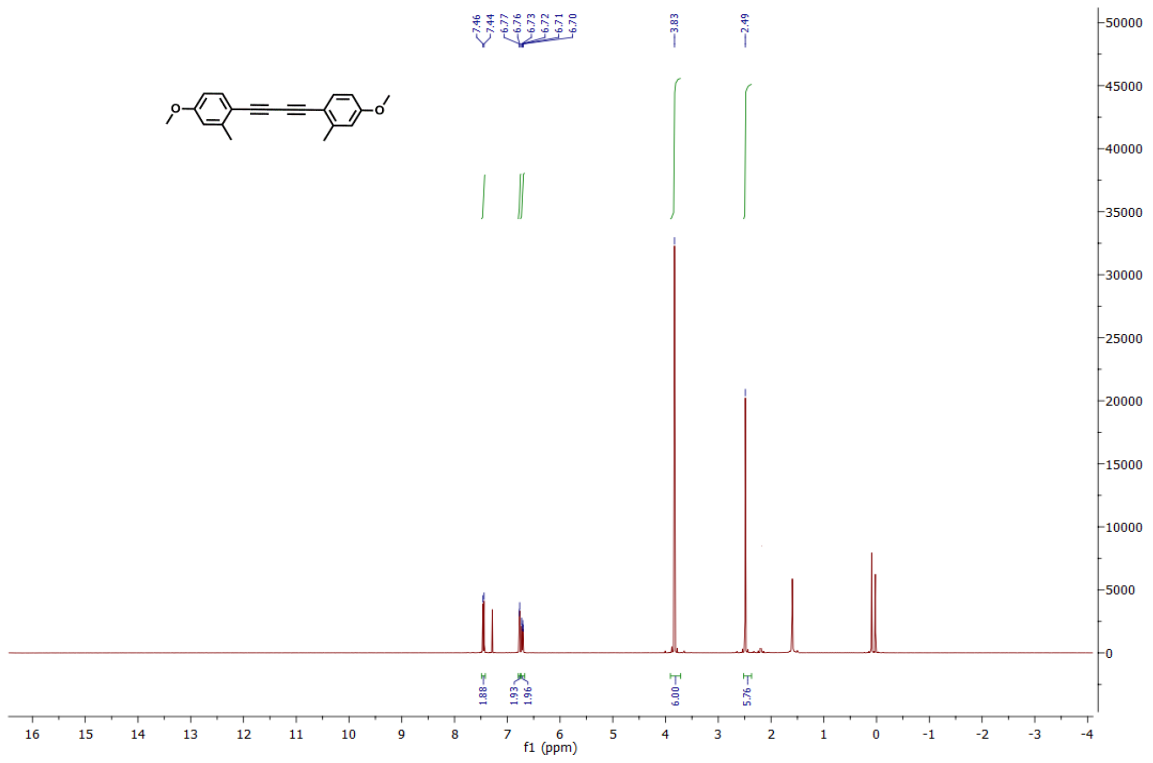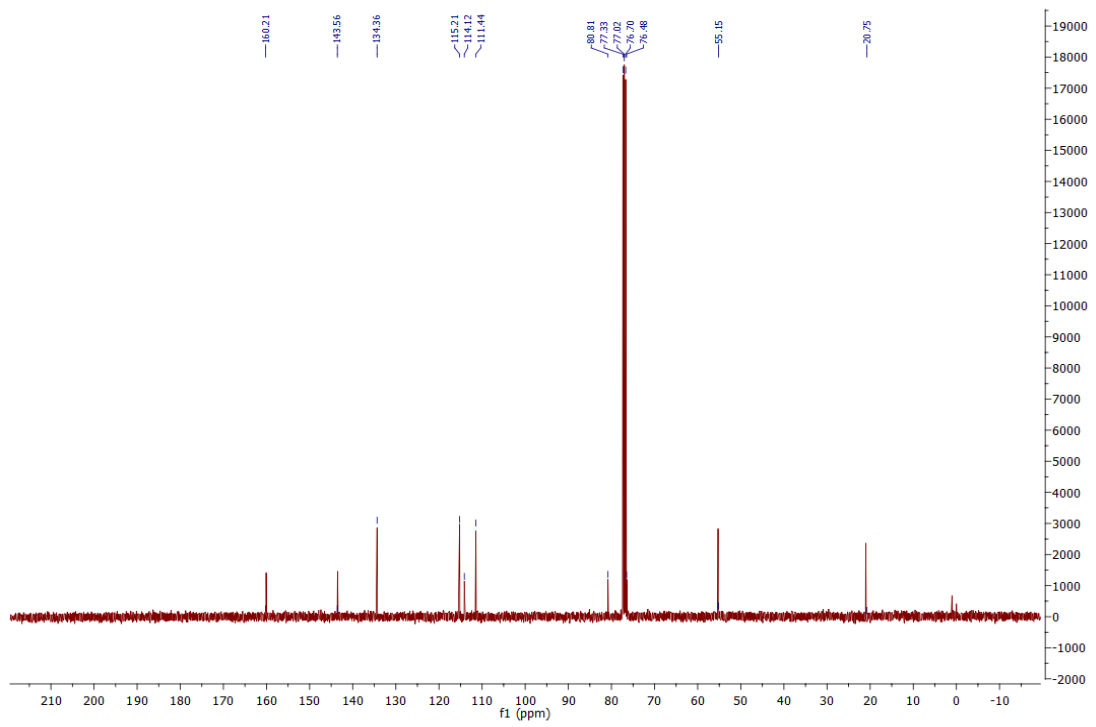

**Figure S9:  $^1\text{H}$  NMR and  $^{13}\text{C}$  NMR data of the compound 9**



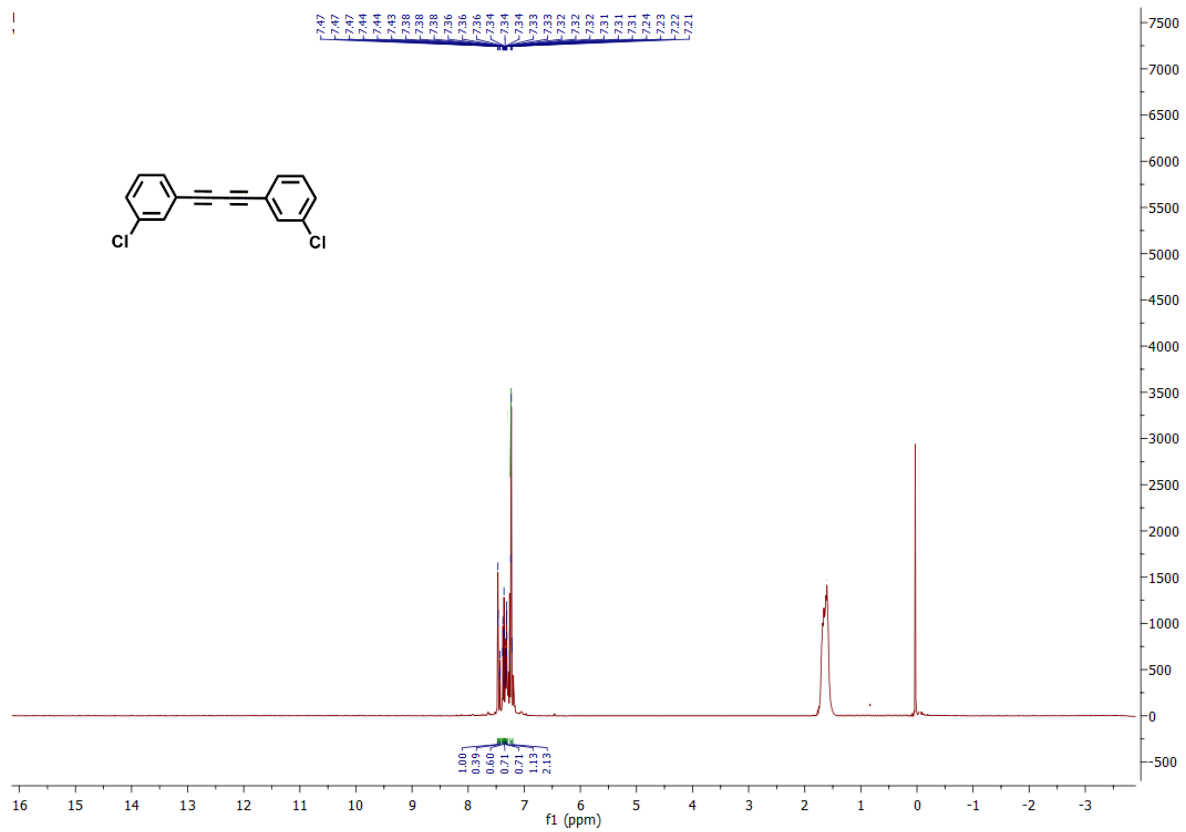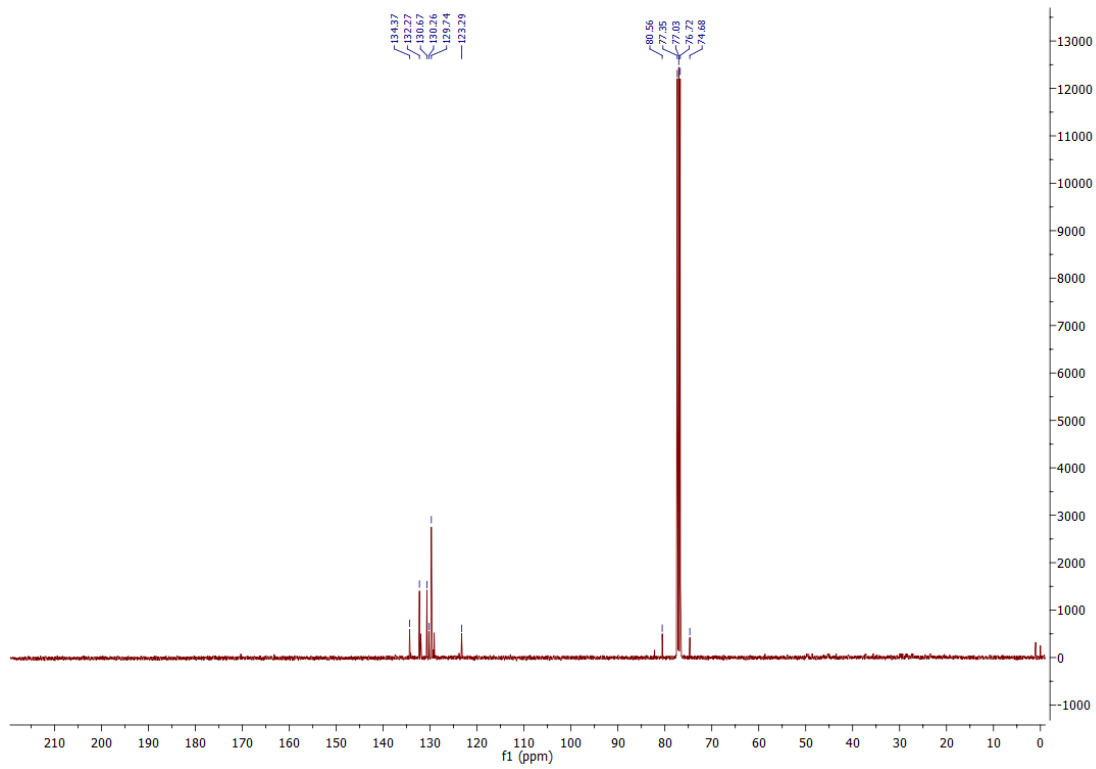

**Figure S10:  $^1\text{H}$  NMR and  $^{13}\text{C}$  NMR data of the compound 10**

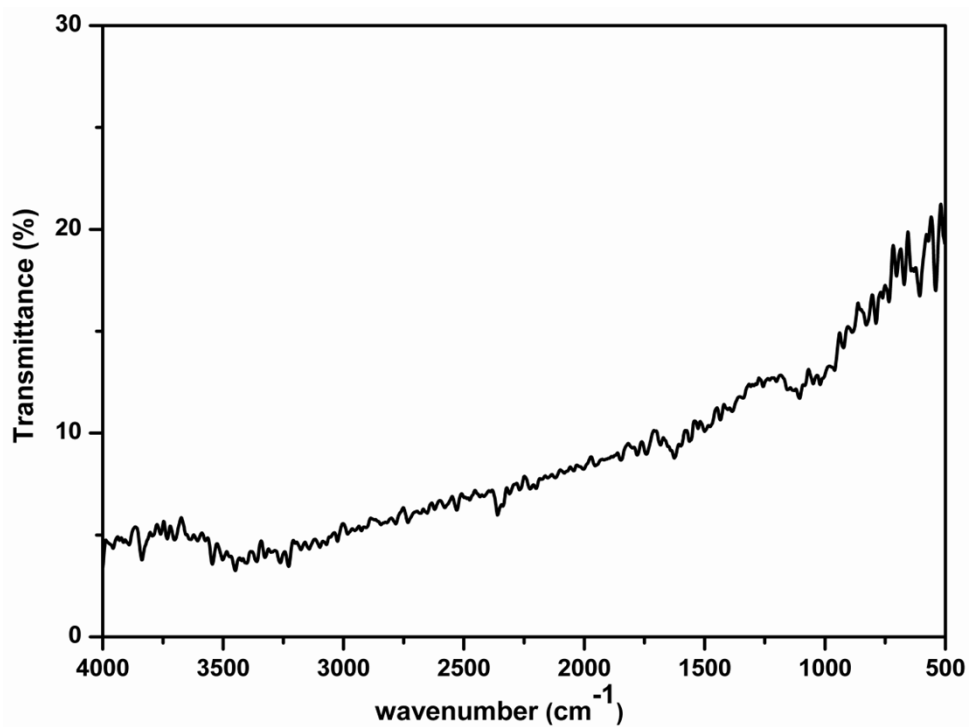

Figure S11. FT-IR spectrum of  $\text{sf-CuInS}_2$

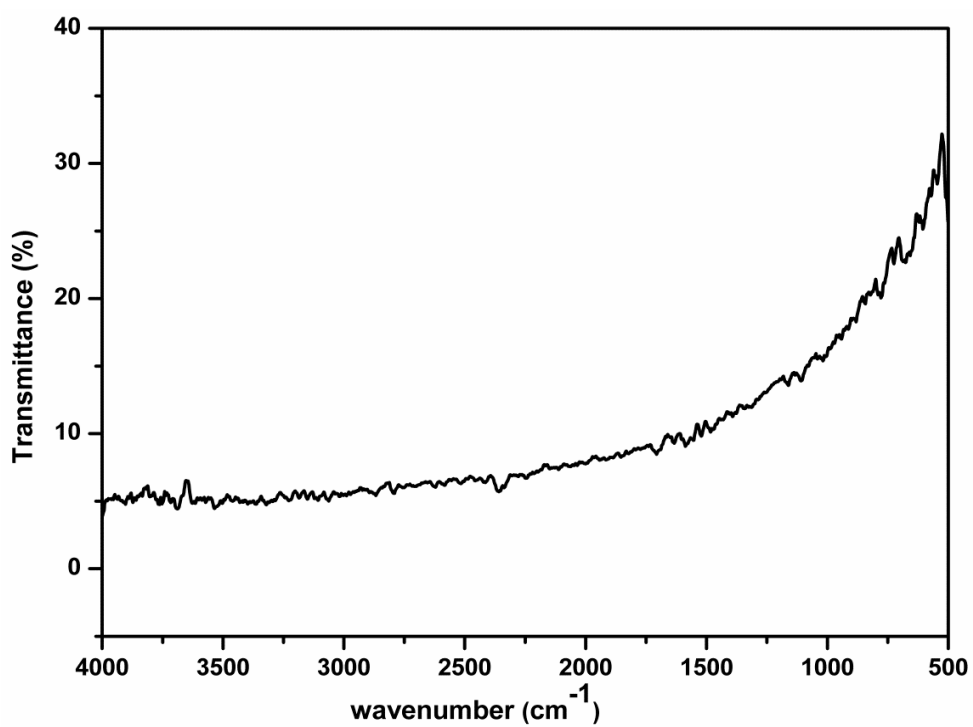

Figure S12. FT-IR spectrum of  $\text{sf-CuInSe}_2$

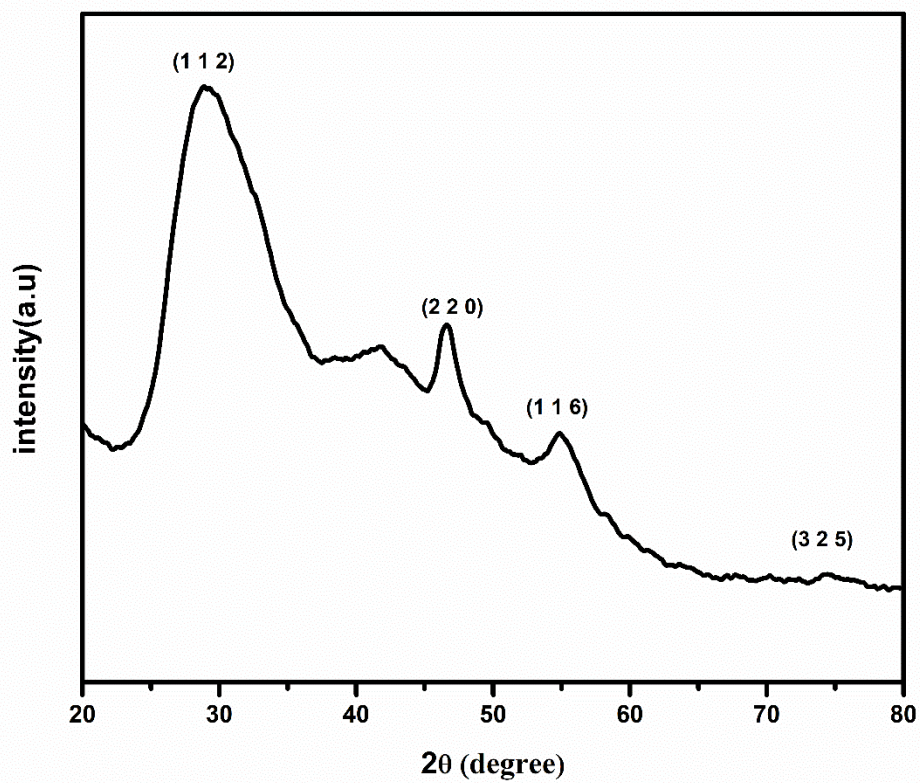

**Figure S13.** Powder X-ray diffraction pattern of **sf-CuInS<sub>2</sub>** nanoparticles after 6<sup>th</sup> cycle catalysis.
